# Supplementary material
Source: publisher site journal article supplement (https://www.dovepress.com/article/329230)

Supplementary data

Fig S1 Western blot analysis of 4-HNE, 3-NT and Iba-1. The results showed the increase in 4-HNE, 3-NT (A, C, D) and Iba-1 (B, E) expression in the RVLM of stressed rats compared with that of the sham group, while administration of PLIN2 siRNA significantly inhibited the increase of Iba-1, 4-HNE and 3-NT. Data are presented as the mean ± SD. n = 3-6, * p ＜ 0.05, # p ＜ 0.05, t test.


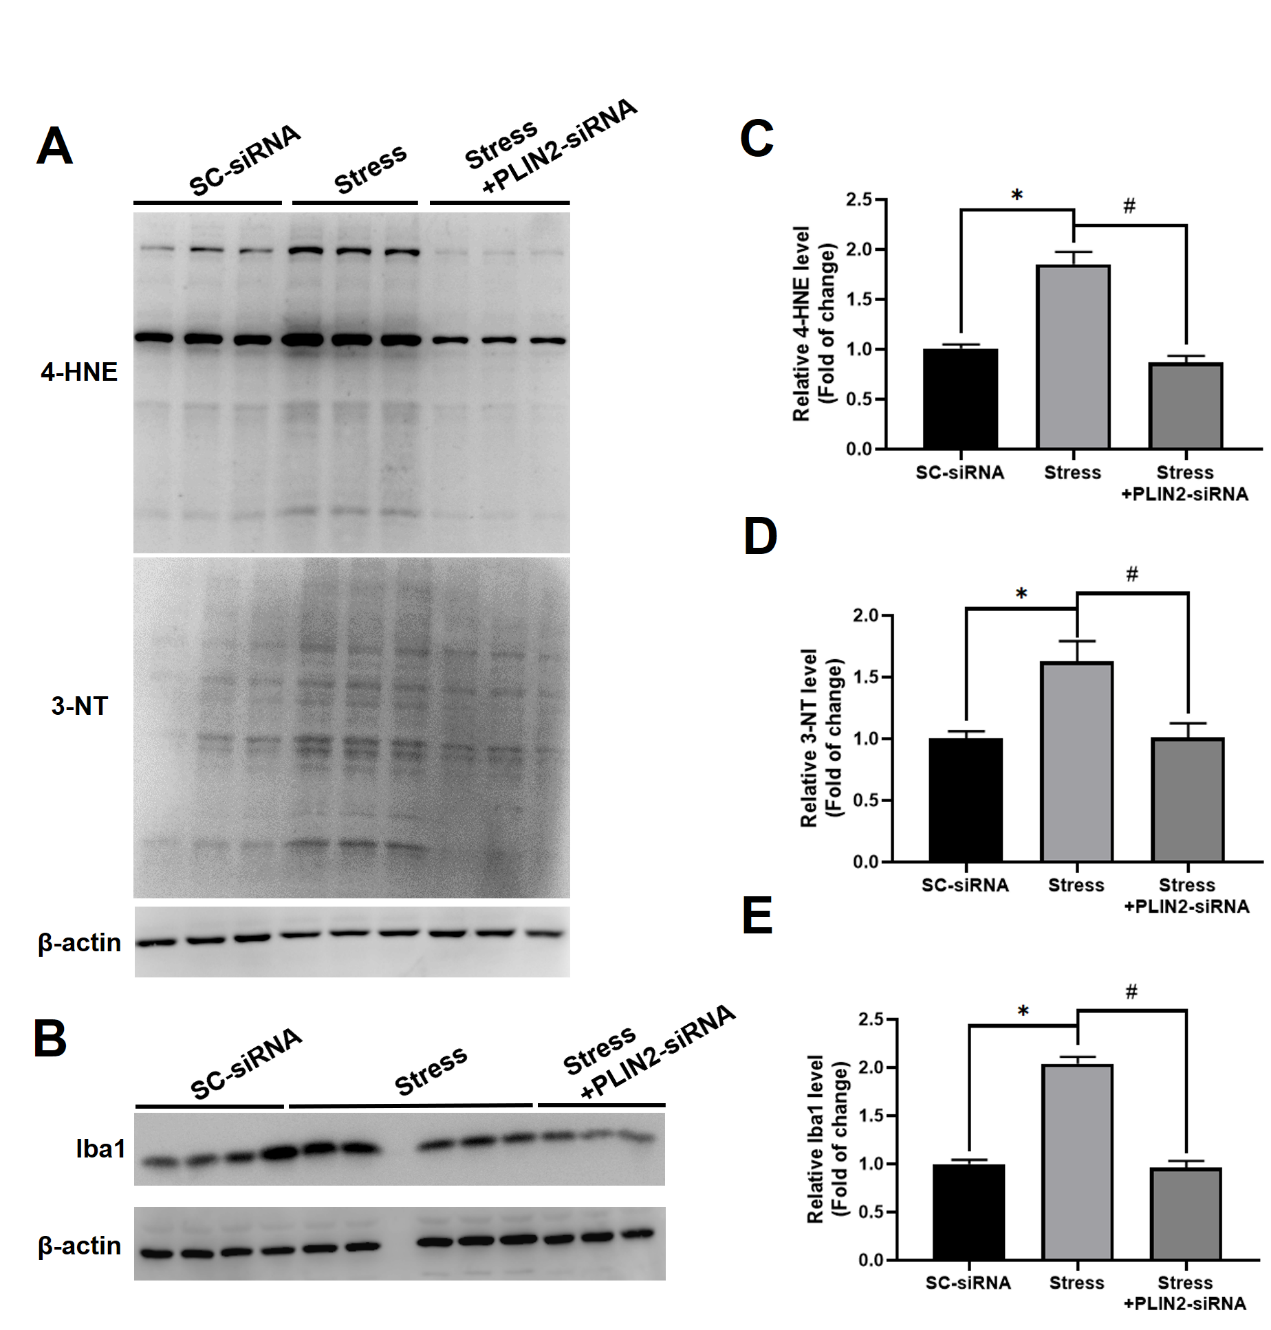

Supplement: Supplementary file 1 [file get_supplementary_file.php]
